# Supplementary material
Source: PubMed Central journal article supplement (PMC8161719)
Supplement: 41576_2021_367_MOESM1_ESM.pdf [file 41576_2021_367_MOESM1_ESM.pdf]

**Supplementary information**

---

**Towards population-scale long-read sequencing**

---

In the format provided by the authors and unedited

**Supplementary table 1. Comparison of three strategies for population-scale, long-read sequencing projects.**

| <b>Approach</b>                                                                                                                                                                               | <b>Feature</b>                       | <b>Number</b>    |
|-----------------------------------------------------------------------------------------------------------------------------------------------------------------------------------------------|--------------------------------------|------------------|
| General parameters                                                                                                                                                                            | Cohort size (individuals or samples) | 2,500            |
|                                                                                                                                                                                               | Genome size                          | 3 Gbp            |
|                                                                                                                                                                                               | PromethION flow cell yield           | 100 Gb           |
|                                                                                                                                                                                               | NovaSeq S4 PE150 lane yield          | 800 Gb           |
| <b>Strategy 1: Long-read sequencing of all samples at equal coverage ('full coverage' approach)</b>                                                                                           |                                      |                  |
| Long-read sequencing                                                                                                                                                                          | Number of samples                    | 2,500            |
|                                                                                                                                                                                               | Coverage                             | 20-fold          |
|                                                                                                                                                                                               | Data                                 | 150,000 Gb       |
|                                                                                                                                                                                               | Number of PromethION flow cells      | 1,500 flow cells |
| <b>Strategy 2: Long-read sequencing of a small proportion of samples at high coverage and the remaining samples at low coverage ('mixed coverage' approach)</b>                               |                                      |                  |
| Long-read sequencing at high coverage                                                                                                                                                         | Number of samples                    | 200 samples      |
|                                                                                                                                                                                               | Coverage                             | 30-fold          |
|                                                                                                                                                                                               | Data                                 | 18,000 Gb        |
|                                                                                                                                                                                               | Number of PromethION flow cells      | 180 flow cells   |
| Long-read sequencing at low coverage                                                                                                                                                          | Number of samples                    | 2,300 samples    |
|                                                                                                                                                                                               | Coverage                             | 8-fold           |
|                                                                                                                                                                                               | Data                                 | 55,200 Gb        |
|                                                                                                                                                                                               | Number of PromethION flow cells      | 552 flow cells   |
| Total                                                                                                                                                                                         | Data needed                          | 73,200 Gb        |
|                                                                                                                                                                                               | Number of PromethION flow cells      | 732 flow cells   |
| <b>Strategy 3: Long-read sequencing of a small proportion of samples at high coverage and the remaining samples at high coverage with short-read sequencing ('mixed sequencing' approach)</b> |                                      |                  |

|                                        |                                      |                |
|----------------------------------------|--------------------------------------|----------------|
| Long-read sequencing at high coverage  | Number of samples                    | 200 samples    |
|                                        | Coverage needed                      | 30-fold        |
|                                        | Data needed                          | 18,000 Gb      |
|                                        | Number of PromethION FC              | 180 flow cells |
| Short-read sequencing at high coverage | Number of samples                    | 2300 samples   |
|                                        | Coverage needed                      | 30-fold        |
|                                        | Data needed                          | 207,000 Gb     |
|                                        | Number of NovaSeq6000 S4 lanes PE150 | 258.75 lanes   |
